# Supplementary material for: Functional Characterization of the CpNAC1 Promoter and Gene from Chimonanthus praecox in Arabidopsis
Source: MDPI journal article supplement (doi:10.3390/ijms24010542), 2022-12-29
Supplement: s1 [file s1]

Table S1. List of primers

| Primer name                       | Primer sequences (5'-3')                   |
|-----------------------------------|--------------------------------------------|
| <i>CpSNAC1-F</i>                  | GATCAAGTGACCTTAGCCCATC                     |
| <i>CpSNAC1-R</i>                  | AGGAGATGAGATGATACTGAGGC                    |
| <i>CpSNAC1-ORF-F</i>              | tccccccggggGAACAGCAATCGGTTGTGAGGC          |
| <i>CpSNAC1-ORF-R</i>              | gcgtcgacGGTGAGTTGTAGCCTGGGTATG             |
| <i>VP16-F</i>                     | catgccatggGAACAGCAATCGGTTGTGAGGC           |
| <i>VP16-R</i>                     | GCAGTGGCAGACTCACATAGGGTGAGTTGTAGCCTGGGTATG |
| <i>CpSNAC1-VP16-F</i>             | GAACAGCAATCGGTTGTGAGGC                     |
| <i>CpSNAC1-VP16-R</i>             | gcgtcgacGGTGAGTTGTAGCCTGGGTATG             |
| pCAMBIA1300- <i>GFP-CpSNAC1-F</i> | gcgtcgacTCTAAAACCAGGAGGCAG                 |
| pCAMBIA1300- <i>GFP-CpSNAC1-R</i> | cgggataccGTCATGGGTTGATGGGCA                |
| <i>qCpSNAC1-F</i>                 | AAGCCTGAACTTCTTACAAATGCC                   |
| <i>qCpSNAC1-R</i>                 | ACTTTGGCTGGCTCTGGACC                       |
| <i>qActin-F</i>                   | GTTATGGTTGGGATGGGACAGAAAG                  |
| <i>qActin-R</i>                   | GGGCTTCAGTAAGGAAACAGGA                     |
| <i>qTublin-F</i>                  | TAGTGACAAGACAGTAGGTGGAGGT                  |
| <i>qTublin-R</i>                  | GTAGGTTCCAGTCCTCACTTCATC                   |
| <i>CpSNAC1-SP1</i>                | GCTCTTCCTCCATCTCATCTCCCTGC                 |
| <i>CpSNAC1-SP2</i>                | GAACAGCAATCGGTTGTGAGGCG                    |
| <i>CpSNAC1pro-pst1-F</i>          | AACTGCAGGAGAGTTGGATGATGAGAAGAAGAT          |
| <i>CpSNAC1pro-ncol-R</i>          | CATGCCATGGGAACAGCAATCGGTTGTGAGGC           |
| <i>CpSNAC1-D1-pst1-F</i>          | AACTGCAGCAAGTAGGGCTAAATAACCCATTACC         |
| <i>CpSNAC1-D2-pst1-F</i>          | AACTGCAGATGTTGTTGCACGAGCGATCAAT            |
| <i>CpSNAC1-D3-pst1-F</i>          | AACTGCAGGTTTTCCAACACGAGCCCTCTCT            |
| <i>CpSNAC1-ncol-R</i>             | CATGCCATGGGAACAGCAATCGGTTGTGAGGC           |
| <i>GUS-F</i>                      | CATCCTCTGGGAACCACTGAAC                     |
| <i>GUS-R</i>                      | CATCACATTGCTCGCTTCGTT                      |
| pCAMBIA1300- <i>CpSNAC1-F</i>     | gcgagctcAACAGCAATCGGTTGTGAGGC              |
| pCAMBIA1300- <i>CpSNAC1-R</i>     | gctctagaACTTTGGCTGGCTCTGGACCT              |

**Table S2. *cis*-regulatory elements in the *CpSNAC1* promoter**

| Factor or <i>cis</i> -regulatory element | No.of <i>cis</i> -regulatorys | Core sequence                                         | Description                                                                 |
|------------------------------------------|-------------------------------|-------------------------------------------------------|-----------------------------------------------------------------------------|
| ABRE                                     | 11                            | TACGTG/ACGTG/<br>CGCACGTGTC<br>/GACACGTGGC/<br>CACGTG | <i>cis</i> -acting element involved in the abscisic acid                    |
| ARE                                      | 2                             | AAACCA                                                | <i>cis</i> -acting regulatory element essential for the anaerobic induction |
| AuxRR-core                               | 1                             | GGTCCAT                                               | <i>cis</i> -acting regulatory element involved in auxin responsiveness      |
| Box 4                                    | 4                             | ATTAAT                                                | part of a conserved DNA module involved in light responsiveness             |
| CAT-box                                  | 2                             | GCCACT                                                | <i>cis</i> -acting regulatory element related to meristem expression        |
| CAAT-box                                 | 36                            | CCAAT/ CAAT/<br>CAAAT/ CAAAT                          | common <i>cis</i> -acting element in promoter and enhancer regions          |
| G-Box                                    | 3                             | CACGTG                                                | <i>cis</i> -acting regulatory element involved in light responsiveness      |
| G-box                                    | 9                             | TACGTG/CACGTG/<br>ACACGTGT/ CACGTGG                   | <i>cis</i> -acting regulatory element involved in light responsiveness      |
| CGTCA-motif                              | 3                             | CGTCA                                                 | <i>cis</i> -acting regulatory element involved in the MeJA-responsiveness   |
| GARE-motif                               | 2                             | TCTGTTG                                               | gibberellin-responsive element                                              |
| MBS                                      | 1                             | CAACTG                                                | MYB binding site involved in drought-inducibility                           |
| MYB                                      | 2                             | CAACAG                                                | responds to dehydration and ABA signals                                     |
| MYC                                      | 4                             | CATTTG                                                | responds to abiotic stress signals                                          |
| P-box                                    | 1                             | CCTTTTG                                               | gibberellin-responsive element                                              |
| Sp1                                      | 1                             | GGGCGG                                                | light responsive element                                                    |
| TATA-box                                 | 28                            | ATTATA/TATAA/TATA/<br>TACAAAA/TAAAGATT/<br>TATACA     | core promoter element around -30 of transcription start                     |
| TGACG-motif                              | 3                             | TGACG                                                 | <i>cis</i> -acting regulatory element involved in the MeJA-responsiveness   |
